# Supplementary material for: Novel 3D µtissues Mimicking the Fibrotic Stroma in Pancreatic Cancer to Study Cellular Interactions and Stroma-Modulating Therapeutics
Source: MDPI journal article supplement (doi:10.3390/cancers13195006), 2021-10-06
Supplement: s1 [file s1]

# Novel 3D $\mu$ tissues Mimicking the Fibrotic Stroma in Pancreatic Cancer to Study Cellular Interactions and Stroma-Modulating Therapeutics

Kunal Pravin Pednekar <sup>1#</sup>, Marcel Alexander Heinrich <sup>1#</sup>, Joop van Baarlen<sup>2</sup> and Jai Prakash <sup>1,\*</sup>

1 Engineered Therapeutics group, Department of Biomaterials Science and Technology, Technical Medical Centre, University of Twente, 7500AE Enschede, The Netherlands

2 Laboratorium Pathologie Oost-Nederland (LabPON), Hengelo, The Netherlands  
k.p.pednekar@utwente.nl  
m.a.heinrich@utwente.nl  
j.vanbaarlen@labpon.nl

\* Correspondence: j.prakash@utwente.nl ; # Authors contributed equally

**Supplementary Table S1: Gene abbreviations.**

| Gene Abbreviation          | Full Name                                      |
|----------------------------|------------------------------------------------|
| $\alpha$ SMA               | Alpha smooth muscle actin                      |
| COL1 $\alpha$ 1            | Collagen, type 1, alpha 1                      |
| FN1                        | Fibronectin 1                                  |
| VIM                        | Vimentin                                       |
| CDH1                       | Cadherin 1 (E-cadherin)                        |
| TGF $\beta$ R1             | Transforming growth factor beta receptor 1     |
| VEGF $\alpha$              | Vascular endothelial growth factor alpha       |
| PDGFR $\beta$              | Platelet-derived growth factor receptor beta 1 |
| POSTN                      | Periostin                                      |
| ITGA5                      | Integrin alpha 5                               |
| PXN                        | Paxillin                                       |
| VCL                        | Vinculin                                       |
| TN-C                       | Tenascin-C                                     |
| HIF1 $\alpha$              | Hypoxia-inducible factor 1 alpha               |
| MMP2                       | Matrix metalloproteinase 2                     |
| IL-6                       | Interleukin 6                                  |
| CK19 (also known as KRT19) | Cytokeratin 19                                 |
| FAP                        | Fibroblast activation protein                  |
| RPS18 (housekeeping)       | Ribosomal protein 18                           |

**Supplementary Table S2: Primers used in real-time PCR.**

| Gene            | Forward Primer         | Reverse Primer            |
|-----------------|------------------------|---------------------------|
| $\alpha$ SMA    | CCCCATCTATGAGGGCTATG   | CAGTGGCCATCTCATTTTCA      |
| COL1 $\alpha$ 1 | GTACTGGATTGACCCCAACC   | CGCCATACTCGAACTGGAAT      |
| FN1             | GTATACGAGGGCCAGCTCAT   | CCCAGGAGACCACAAAGCTA      |
| VIM             | TCCAGAGAGAGGAAGCCGAA   | AAGGTCAAGACGTGCCAGAG      |
| CDH1            | AACCCAAGCACGTATCAGGG   | GAGTGTGGGGGCATCATCA       |
| TGF $\beta$ R1  | TCTTGGAACCTGCTCTCCTG   | GTCCCACAACCTCCATCAGC      |
| VEGF $\alpha$   | GCTCAGAGCGGAGAAAGCAT   | GCAACGCGAGTCTGTGTTTT      |
| PDGFR $\beta$   | AGGCAAGCTGGTCAAGATCT   | GCTGTTGAAGATGCTCTCCG      |
| POSTN           | ACAAGAAGAGGTCACCAAGGTC | CTTGCAACTTCCTCACGGGT      |
| ITGA5           | CAACTTCTCCTTGGACCCCC   | GTCTCTATCCGGCTCTTGC       |
| PXN             | CATGGACGACCTCGACGC     | CAAGAACACAGGCCGTTTGG      |
| VCL             | CAGAACTGGCTTGCAGATCC   | CTCCTTTCCCCTGTCTTCGT      |
| TN-C            | GAAGAGCATTCTGTCAGCG    | CCCACTCCACTTCCACAGAT      |
| HIF1 $\alpha$   | ATGTAATGCTCCCCTCACCC   | CAGGGTCAGCACTACTTCGA      |
| MMP2            | TTTCTATGGCTGCCCCAAGG   | GTCAAGGTCACCTGTCTGGG      |
| IL-6            | TGATGCTGGTGACAACCACGGC | TAAGCCTCCGACTTGTGAAGTGGTA |
| CK19            | CGCGACTACAGCCACTACTA   | AGAGCCTGTTCCGTCTCAA       |
| FAP             | GCAGTGTATCGAAAGCTGGG   | AGGGCCAGTGATGAAACGTA      |
| RPS18           | TGAGGTGGAACGTGTGATCA   | CCTCTATGGGCCCGAATCTT      |

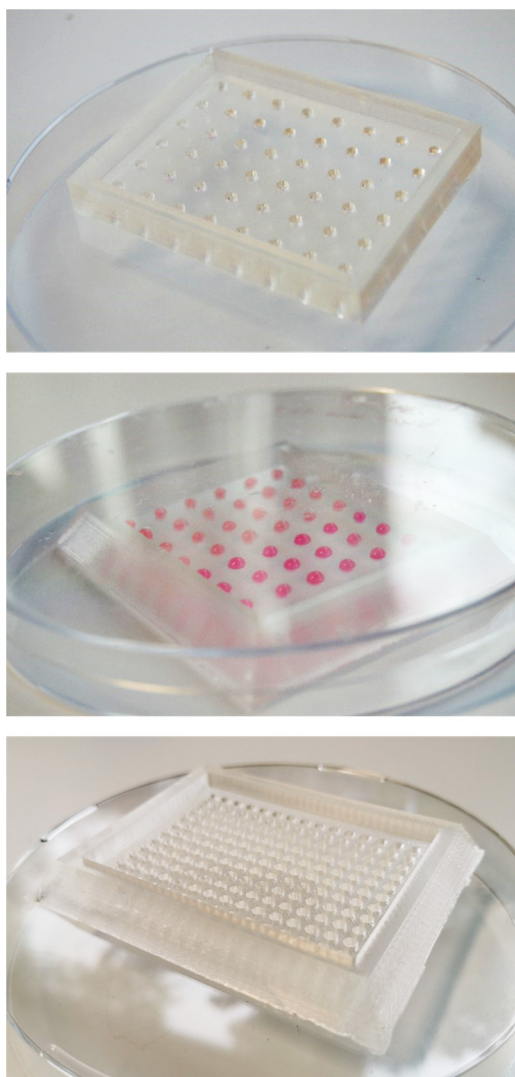

Figure S1: Custom-made PDMS well plates.

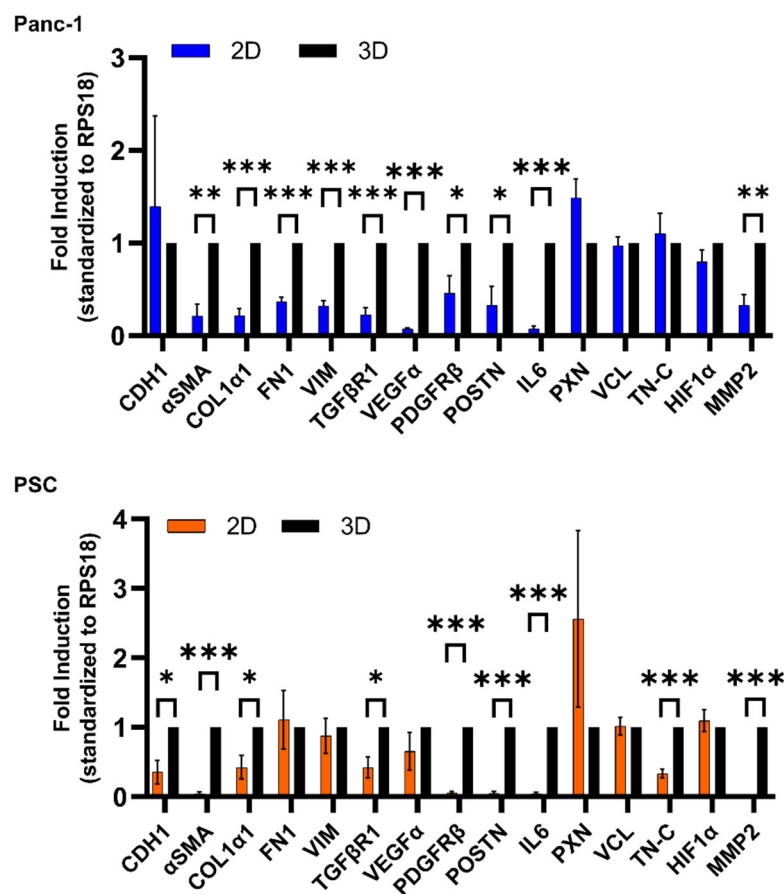

Figure S2: Gene expression for 2D monolayer cultures versus 3D cultures. Statistical analysis was performed by two-tailed Student's *t*-test. \**p* < 0.05, \*\**p* < 0.01, \*\*\**p* < 0.001.

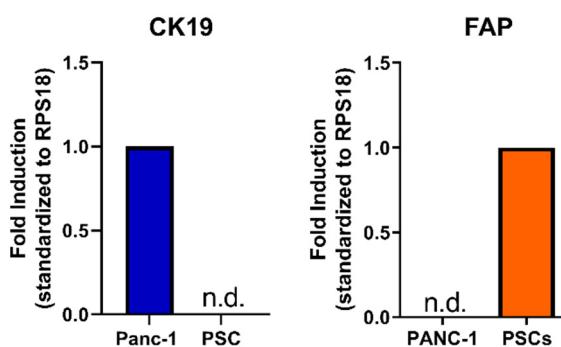

Figure S3: Specific expression of CK19 and FAP in Panc-1 and PSC 3D cultures.

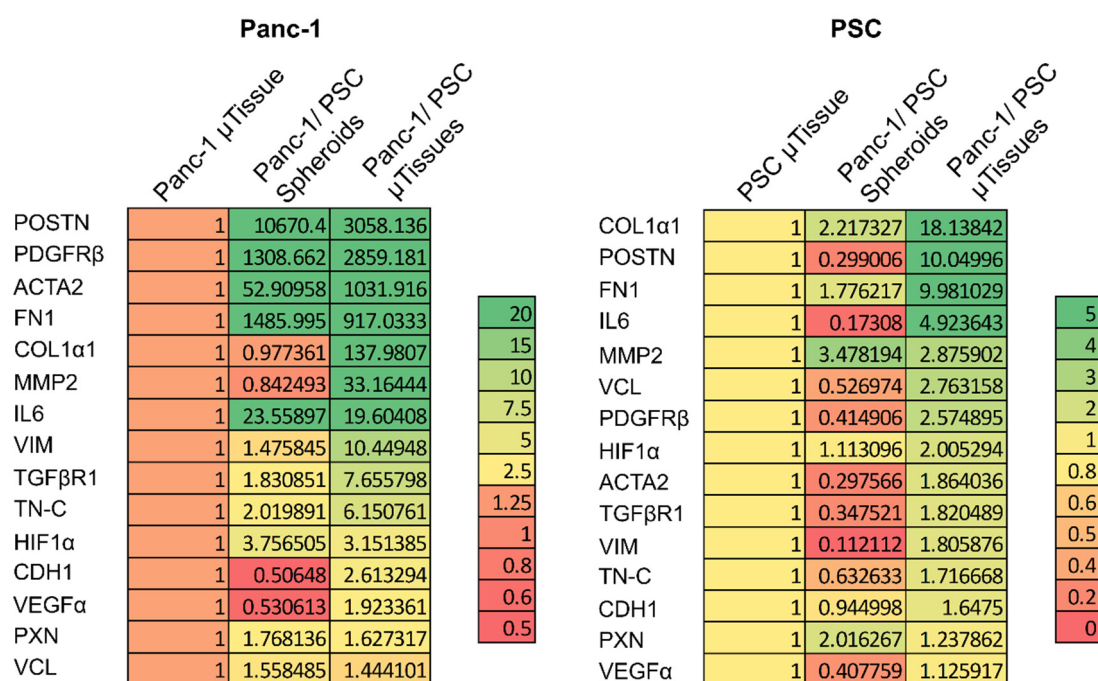

Figure S4: Gene expression profile with exact numbers.

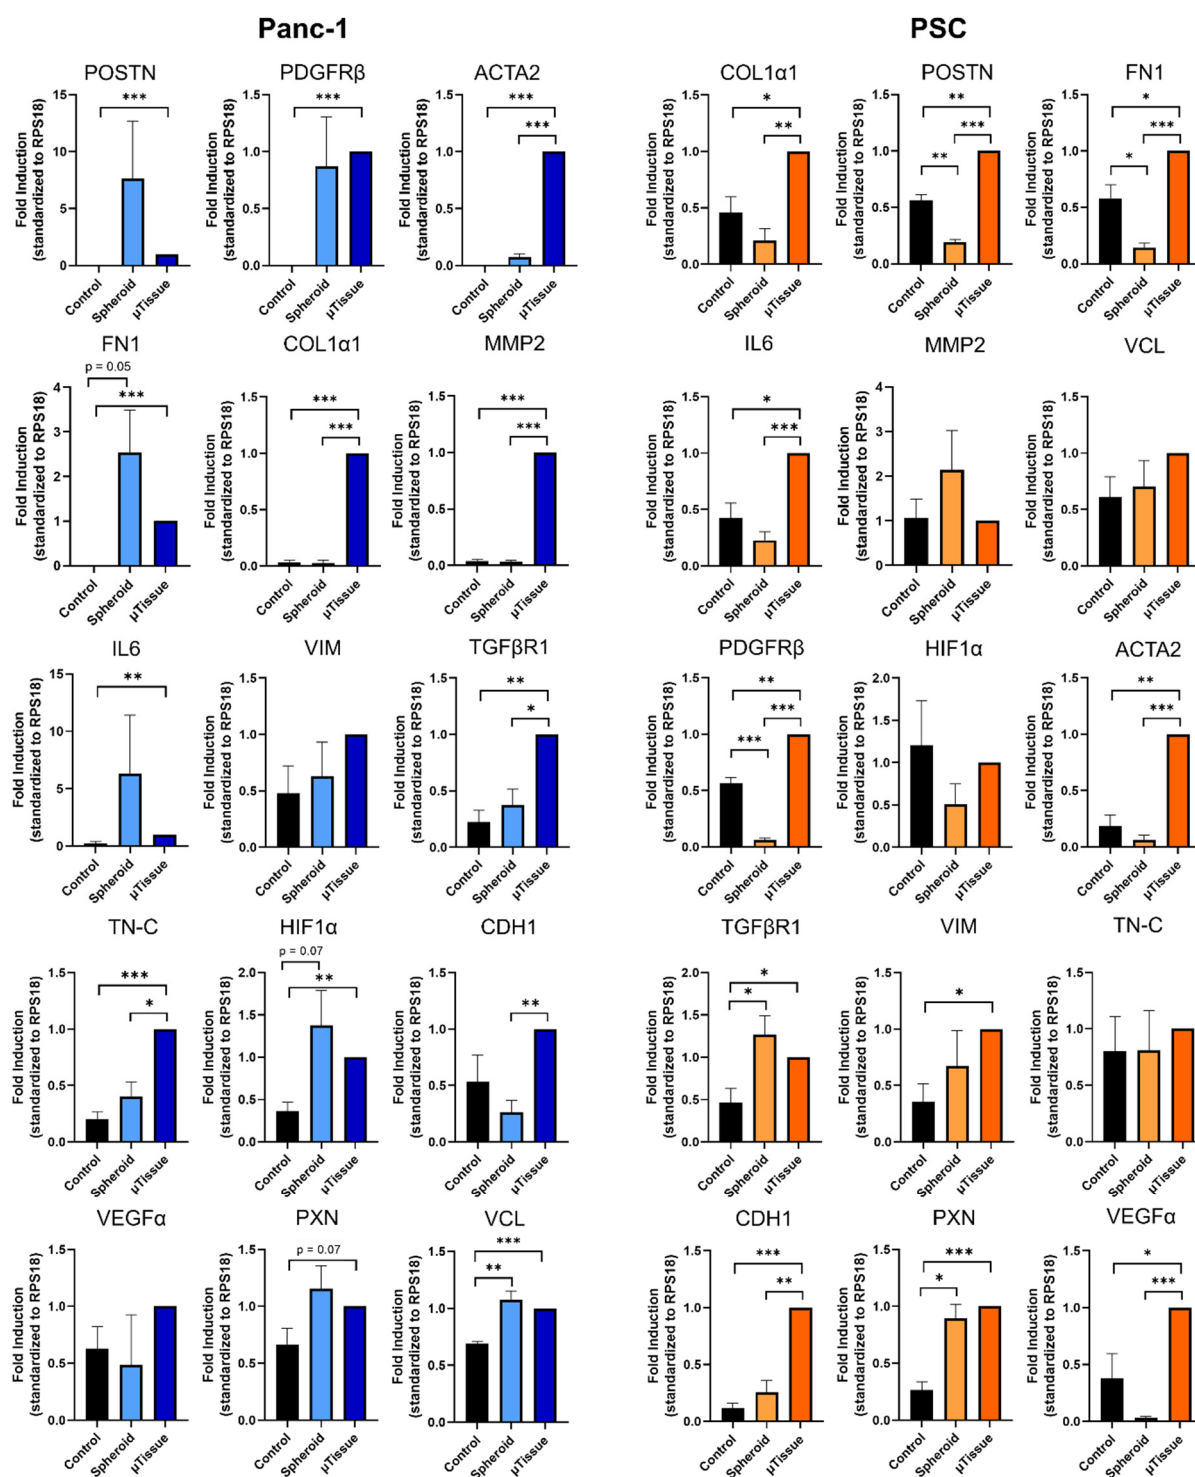

**Figure S5:** Gene expression comparing 3D single culture of Panc-1, Panc-1/ PSC heterospheroids and Panc-1/ PSC  $\mu$ tissues. Standardized to CK19 (left, blue graphs) and comparing 3D single culture of PSC, Panc-1/ PSC heterospheroids and Panc-1/ PSC  $\mu$ tissues standardized to FAP (right, orange graphs). Statistical analysis was performed by two-tailed Student's *t*-test. \* $p < 0.05$ , \*\* $p < 0.01$ , \*\*\* $p < 0.001$ .

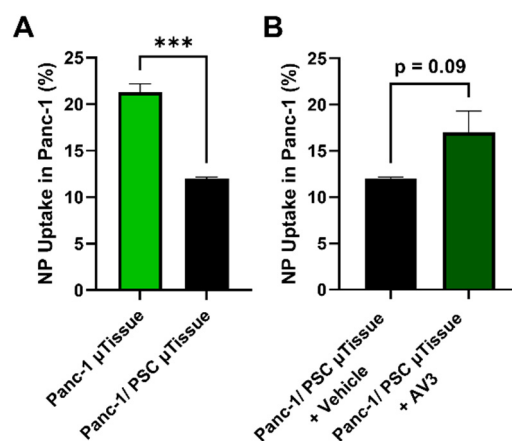

**Figure S6: Nanoparticle Uptake in Panc-1 cell core.** (A) Nanoparticle uptake in Panc-1 for Panc-1  $\mu$ tissue versus Panc-1/ PSC  $\mu$ tissues. (B) Nanoparticle uptake in Panc-1 for Panc-1/ PSC  $\mu$ tissue treated with vehicle (DMSO) or 50  $\mu$ M AV3. Statistical analysis was performed by two-tailed Student's *t*-test. \*\*\* $p < 0.001$ .
